# Supplementary material
Source: MDPI journal article supplement (https://www.mdpi.com/2077-1312/9/7/764)
Supplement: s1 [file s1]

**Table S1.** Morphometric characteristics of noble pen shells along the transect 1 (T1).

| No | Label<br>(L=left:<br>R=right) | Transect | Morphometrics |        |            |
|----|-------------------------------|----------|---------------|--------|------------|
|    |                               |          | Width         | Height | MaxHeight* |
|    |                               |          | w             | UL     | Ht         |
| 1  | L1                            | 1        | 16            | 35     | 63,64      |
| 2  | L2                            | 1        | 15            | 36     | 62,85      |
| 3  | L3                            | 1        | 15            | 50     | 76,85      |
| 4  | L4                            | 1        | 10            | 30     | 47,9       |
| 5  | L5                            | 1        | 10            | 20     | 37,9       |
| 6  | L6                            | 1        | 15            | 39     | 65,85      |
| 7  | L7                            | 1        | 10            | 40     | 57,9       |
| 8  | L8                            | 1        | 10            | 30     | 47,9       |
| 9  | L9                            | 1        | 10            | 35     | 52,9       |
| 10 | L10                           | 1        | 10            | 30     | 47,9       |
| 11 | L11                           | 1        | 12            | 35     | 56,48      |
| 12 | L12                           | 1        | 15            | 40     | 66,85      |
| 13 | L13                           | 1        | 13            | 30     | 53,27      |
| 14 | L14                           | 1        | 10            | 35     | 52,9       |
| 15 | L15                           | 1        | 15            | 36     | 62,85      |
| 16 | L16                           | 1        | 16            | 42     | 70,64      |
| 17 | L17                           | 1        | 15            | 35     | 61,85      |
| 18 | L18                           | 1        | 20            | 45     | 80,8       |
| 19 | L19                           | 1        | 13            | 47     | 70,27      |
| 20 | L20                           | 1        | 12            | 38     | 59,48      |
| 21 | L21                           | 1        | 12            | 40     | 61,48      |
| 22 | L22                           | 1        | 10            | 37     | 54,9       |
| 23 | L23                           | 1        | 10            | 40     | 57,9       |
| 24 | L24                           | 1        | 12            | 40     | 61,48      |
| 25 | L25                           | 1        | 14            | 37     | 62,06      |
| 26 | L26                           | 1        | 10            | 35     | 52,9       |
| 27 | L27                           | 1        | 15            | 37     | 63,85      |
| 28 | R1                            | 1        | 14            | 24     | 49,06      |
| 29 | R2                            | 1        | 13            | 17     | 40,27      |
| 30 | R3                            | 1        | 15            | 32     | 58,85      |
| 31 | R4                            | 1        | 18            | 36     | 68,22      |
| 32 | R5                            | 1        | 20            | 40     | 75,8       |
| 33 | R6                            | 1        | 18            | 35     | 67,22      |
| 34 | R7                            | 1        | 14            | 35     | 60,06      |
| 35 | R8                            | 1        | 17            | 45     | 75,43      |
| 36 | R9                            | 1        | 17            | 42     | 72,43      |
| 37 | R10                           | 1        | 15            | 34     | 60,85      |
| 38 | R11                           | 1        | 18            | 37     | 69,22      |
| 39 | R12                           | 1        | 16            | 40     | 68,64      |
| 40 | R13                           | 1        | 21            | 45     | 82,59      |
| 41 | R14                           | 1        | 19            | 42     | 76,01      |

|    |     |   |    |    |              |
|----|-----|---|----|----|--------------|
| 42 | R15 | 1 | 16 | 27 | 55,64        |
| 43 | R16 | 1 | 13 | 30 | 53,27        |
| 44 | R17 | 1 | 17 | 38 | 68,43        |
| 45 | R18 | 1 | 20 | 40 | 75,8         |
| 46 | R19 | 1 | 18 | 38 | 70,22        |
| 47 | R20 | 1 | 21 | 41 | 78,59        |
| 48 | R21 | 1 | 22 | 44 | 83,38        |
| 49 | R22 | 1 | 15 | 38 | 64,85        |
| 50 | R23 | 1 | 15 | 33 | 59,85        |
| 51 | R24 | 1 | 20 | 37 | 72,8         |
| 52 | R25 | 1 | 21 | 46 | <b>83,59</b> |
| 53 | R26 | 1 | 14 | 28 | 53,06        |
| 54 | R27 | 1 | 14 | 37 | 62,06        |
| 55 | R28 | 1 | 15 | 36 | 62,85        |
| 56 | R29 | 1 | 18 | 37 | 69,22        |
| 57 | R30 | 1 | 19 | 46 | 80,01        |
| 58 | R31 | 1 | 14 | 37 | 62,06        |
| 59 | R32 | 1 | 16 | 42 | 70,64        |
| 60 | R33 | 1 | 17 | 43 | 73,43        |
| 61 | R34 | 1 | 14 | 33 | 58,06        |
| 62 | R35 | 1 | 15 | 35 | 61,85        |
| 63 | R36 | 1 | 16 | 38 | 66,64        |
| 64 | R37 | 1 | 16 | 38 | 66,64        |
| 65 | R38 | 1 | 16 | 38 | 66,64        |
| 66 | R39 | 1 | 17 | 40 | 70,43        |
| 67 | R40 | 1 | 17 | 40 | 70,43        |
| 68 | R41 | 1 | 16 | 38 | 66,64        |
| 69 | R42 | 1 | 16 | 38 | 66,64        |
| 70 | R43 | 1 | 18 | 43 | 75,22        |
| 71 | R44 | 1 | 15 | 38 | 64,85        |
| 72 | R45 | 1 | 16 | 37 | 65,64        |
| 73 | R46 | 1 | 16 | 41 | 69,64        |
| 74 | R47 | 1 | 17 | 39 | 69,43        |
| 75 | R48 | 1 | 16 | 39 | 67,64        |

\*Max Height (Ht) is calculated  $Ht = 1.79w + 0.5 + UL$

**Table S2.** Morphometric characteristics of noble pen shells along the transect 2 (T2).

| No | Label<br>(L=left;<br>R=right) | Transect | Morphometrics |              |                  |
|----|-------------------------------|----------|---------------|--------------|------------------|
|    |                               |          | Width<br>w    | Height<br>UL | MaxHeight*<br>Ht |
| 1  | L1                            | 2        | 10            | 37           | 54,9             |
| 2  | L2                            | 2        | 10            | 44           | 61,9             |
| 3  | L3                            | 2        | 12            | 44           | 65,48            |
| 4  | L4                            | 2        | 11            | 45           | 64,69            |
| 5  | L5                            | 2        | 9             | 55           | 71,11            |
| 6  | L6                            | 2        | 10            | 24           | 41,9             |
| 7  | L7                            | 2        | 10            | 33           | 50,9             |
| 8  | L8                            | 2        | 10            | 34           | 51,9             |
| 9  | L9                            | 2        | 10            | 34           | 51,9             |
| 10 | L10                           | 2        | 12            | 36           | 57,48            |
| 11 | L11                           | 2        | 15            | 40           | 66,85            |
| 12 | L12                           | 2        | 10            | 35           | 52,9             |
| 13 | L13                           | 2        | 13            | 32           | 55,27            |
| 14 | L14                           | 2        | 12            | 29           | 50,48            |
| 15 | L15                           | 2        | 12            | 38           | 59,48            |
| 16 | L16                           | 2        | 12            | 39           | 60,48            |
| 17 | L17                           | 2        | 14            | 39           | 64,06            |
| 18 | L18                           | 2        | 12            | 40           | 61,48            |
| 19 | L19                           | 2        | 10            | 50           | 67,9             |
| 20 | L20                           | 2        | 12            | 45           | 66,48            |
| 21 | L21                           | 2        | 12            | 37           | 58,48            |
| 22 | L22                           | 2        | 12            | 41           | 62,48            |
| 23 | L23                           | 2        | 14            | 45           | 70,06            |
| 24 | L24                           | 2        | 13            | 36           | 59,27            |
| 25 | L25                           | 2        | 8             | 36           | 50,32            |
| 26 | L26                           | 2        | 10            | 43           | 60,9             |
| 27 | L27                           | 2        | 10            | 38           | 55,9             |
| 28 | L28                           | 2        | 17            | 31           | 61,43            |
| 29 | L29                           | 2        | 16            | 48           | 76,64            |
| 30 | L30                           | 2        | 10            | 44           | 61,9             |
| 31 | L31                           | 2        | 16            | 30           | 58,64            |
| 32 | L32                           | 2        | 12            | 44           | 65,48            |
| 33 | L33                           | 2        | 12            | 35           | 56,48            |
| 34 | L34                           | 2        | 14            | 45           | 70,06            |
| 35 | L35                           | 2        | 10            | 38           | 55,9             |
| 36 | L36                           | 2        | 16            | 30           | 58,64            |
| 37 | L37                           | 2        | 15            | 55           | 81,85            |
| 38 | L38                           | 2        | 14            | 42           | 67,06            |
| 39 | L39                           | 2        | 15            | 45           | 71,85            |
| 40 | L40                           | 2        | 12            | 50           | 71,48            |
| 41 | L46                           | 2        | 14            | 45           | 70,06            |
| 42 | L41                           | 2        | 12            | 42           | 63,48            |

|    |     |   |    |    |       |
|----|-----|---|----|----|-------|
| 43 | L42 | 2 | 12 | 36 | 57,48 |
| 44 | L43 | 2 | 17 | 42 | 72,43 |
| 45 | L44 | 2 | 15 | 42 | 68,85 |
| 46 | L45 | 2 | 14 | 42 | 67,06 |
| 47 | L47 | 2 | 12 | 35 | 56,48 |
| 48 | L48 | 2 | 16 | 45 | 73,64 |
| 49 | L49 | 2 | 16 | 46 | 74,64 |
| 50 | L50 | 2 | 16 | 39 | 67,64 |
| 51 | L51 | 2 | 15 | 47 | 73,85 |
| 52 | L52 | 2 | 15 | 36 | 62,85 |
| 53 | L53 | 2 | 19 | 36 | 70,01 |
| 54 | L54 | 2 | 16 | 35 | 63,64 |
| 55 | L55 | 2 | 14 | 37 | 62,06 |
| 56 | L56 | 2 | 14 | 44 | 69,06 |
| 57 | L57 | 2 | 13 | 44 | 67,27 |
| 58 | R1  | 2 | 17 | 41 | 71,43 |
| 59 | R2  | 2 | 15 | 31 | 57,85 |
| 60 | R3  | 2 | 18 | 48 | 80,22 |
| 61 | R4  | 2 | 18 | 36 | 68,22 |
| 62 | R5  | 2 | 16 | 37 | 65,64 |
| 63 | R6  | 2 | 15 | 28 | 54,85 |
| 64 | R7  | 2 | 18 | 46 | 78,22 |
| 65 | R8  | 2 | 18 | 43 | 75,22 |
| 66 | R9  | 2 | 16 | 30 | 58,64 |
| 67 | R10 | 2 | 16 | 33 | 61,64 |
| 68 | R11 | 2 | 17 | 36 | 66,43 |
| 69 | R12 | 2 | 16 | 40 | 68,64 |
| 70 | R13 | 2 | 14 | 40 | 65,06 |
| 71 | R14 | 2 | 18 | 37 | 69,22 |
| 72 | R15 | 2 | 19 | 33 | 67,01 |
| 73 | R16 | 2 | 18 | 40 | 72,22 |
| 74 | R17 | 2 | 17 | 38 | 68,43 |
| 75 | R18 | 2 | 18 | 38 | 70,22 |
| 76 | R19 | 2 | 15 | 39 | 65,85 |
| 77 | R20 | 2 | 15 | 30 | 56,85 |
| 78 | R21 | 2 | 18 | 41 | 73,22 |
| 79 | R22 | 2 | 16 | 34 | 62,64 |
| 80 | R23 | 2 | 18 | 44 | 76,22 |
| 81 | R24 | 2 | 18 | 44 | 76,22 |
| 82 | R25 | 2 | 15 | 33 | 59,85 |
| 83 | R26 | 2 | 18 | 40 | 72,22 |
| 84 | R27 | 2 | 17 | 35 | 65,43 |
| 85 | R28 | 2 | 18 | 42 | 74,22 |
| 86 | R29 | 2 | 17 | 28 | 58,43 |
| 87 | R30 | 2 | 16 | 35 | 63,64 |
| 88 | R31 | 2 | 16 | 38 | 66,64 |

|     |     |   |    |    |       |
|-----|-----|---|----|----|-------|
| 89  | R32 | 2 | 17 | 37 | 67,43 |
| 90  | R33 | 2 | 17 | 36 | 66,43 |
| 91  | R34 | 2 | 21 | 44 | 81,59 |
| 92  | R35 | 2 | 19 | 42 | 76,01 |
| 93  | R36 | 2 | 19 | 41 | 75,01 |
| 94  | R37 | 2 | 15 | 33 | 59,85 |
| 95  | R38 | 2 | 18 | 43 | 75,22 |
| 96  | R39 | 2 | 16 | 48 | 76,64 |
| 97  | R40 | 2 | 18 | 42 | 74,22 |
| 98  | R41 | 2 | 17 | 40 | 70,43 |
| 99  | R42 | 2 | 18 | 34 | 66,22 |
| 100 | R43 | 2 | 14 | 30 | 55,06 |
| 101 | R44 | 2 | 16 | 39 | 67,64 |
| 102 | R45 | 2 | 16 | 45 | 73,64 |
| 103 | R46 | 2 | 18 | 39 | 71,22 |
| 104 | R48 | 2 | 16 | 42 | 70,64 |
| 105 | R47 | 2 | 19 | 43 | 77,01 |
| 106 | R49 | 2 | 17 | 40 | 70,43 |
